# Supplementary material
Source: PubMed Central journal article supplement (PMC4385772)
Supplement: SD4.pdf [file SD4.pdf]

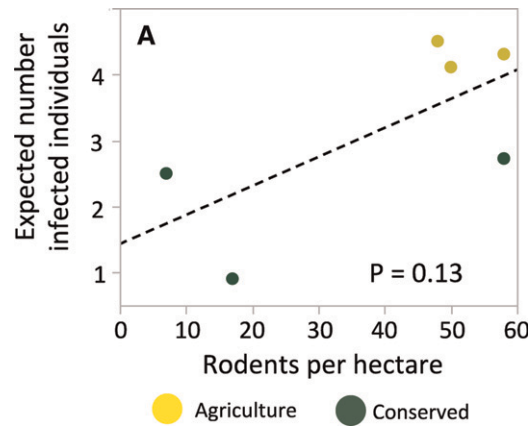

SUPPLEMENTAL FIGURE 1. No significant relationship was observed between plague activity index (PAI, expected number infected individuals) and rodent host abundance.

SUPPLEMENTAL TABLE 1

Rodent abundance, diversity, and plague risk indices (PAI, expected number of seropositive rodents) for agricultural (agr) and conserved (cons) sites in research sites in northern Tanzania

|                              | Kambi ya Nyoka |      | Manyara |      | Tloma |      |
|------------------------------|----------------|------|---------|------|-------|------|
|                              | cons           | agr  | cons    | agr  | cons  | agr  |
| <i>Gerbilliscus robustus</i> | 0              | 0    | 1       | 2    | 0     | 0    |
| <i>Grammomys dolichurus</i>  | 3              | 0    | 0       | 0    | 12    | 0    |
| <i>Graphiurus murinus</i>    | 2              | 0    | 0       | 0    | 1     | 0    |
| <i>Lophuromys makundii</i>   | 31             | 0    | 0       | 0    | 4     | 0    |
| <i>Lemniscomys striatus</i>  | 6              | 3    | 1       | 0    | 0     | 2    |
| <i>Mastomys natalensis</i>   | 1              | 44   | 6       | 46   | 0     | 42   |
| <i>Mus</i> spp.              | 2              | 11   | 0       | 0    | 0     | 6    |
| <i>Praomys taitae</i>        | 19             | 0    | 0       | 0    | 11    | 0    |
| No. of individuals           | 64             | 58   | 8       | 48   | 28    | 50   |
| Rodent richness (Chao1)      | 7.0            | 3.0  | 3.9     | 2.0  | 4.0   | 3.0  |
| Simpson                      | 1.54           | 0.82 | 0.93    | 0.55 | 1.49  | 0.7  |
| Shannon                      | 1.35           | 0.68 | 0.74    | 0.17 | 1.12  | 0.53 |
| No. of plague positive       | 2              | 1    | 1       | 4    | 0     | 4    |
| No. of tested                | 23             | 17   | 4       | 26   | 16    | 20   |
| Plague activity index        | 2.73           | 4.31 | 2.5     | 4.5  | 0.9   | 4.11 |

SUPPLEMENTAL TABLE 2

Seroprevalence for *Yersinia pestis* antibodies (the number positive versus the number tested) in rodent species caught in trapping grids in conserved and agricultural areas

| Species                      | Agricultural | Conserved | Total |
|------------------------------|--------------|-----------|-------|
| <i>Gerbilliscus robustus</i> | 0/1          | –         | 0/1   |
| <i>Grammomys dolichurus</i>  | –            | 1/10      | 1/10  |
| <i>Graphiurus murinus</i>    | 0/2          | –         | 0/2   |
| <i>Lemniscomys striatus</i>  | 0/2          | 0/2       | 0/4   |
| <i>Lophuromys makundii</i>   | –            | 2/15      | 2/15  |
| <i>Mastomys natalensis</i>   | 9/57         | 0/5       | 9/62  |
| <i>Mus</i> spp.              | 0/1          | –         | 0/1   |
| <i>Praomys taitae</i>        | –            | 0/11      | 0/11  |

SUPPLEMENTAL TABLE 3

Host–flea associations (percent of all identified fleas), and overall intensity of infestation per habitat type per host species

| Species                                 | <i>Lemniscomys striatus</i> | <i>Lophuromys makundii</i> | <i>Mastomys natalensis</i> | <i>Praomys taitae</i> |
|-----------------------------------------|-----------------------------|----------------------------|----------------------------|-----------------------|
| <i>Ctenophthalmus calceatus cabirus</i> | 2%                          | 4%                         | 4%                         | 2%                    |
| <i>Ctenophthalmus evidens</i>           | –                           | 12%                        | –                          | –                     |
| <i>Ctenophthalmus</i> sp.               | –                           | 8%                         | –                          | –                     |
| <i>Dinopsyllus longifrons</i>           | 2%                          | 10%                        | –                          | –                     |
| <i>Dinopsyllus lypusus</i>              | –                           | –                          | 35%                        | –                     |
| <i>Leptopsylla aethiopica</i>           | –                           | –                          | –                          | 2%                    |
| <i>Listropsylla basilewskyi</i>         | –                           | –                          | 2%                         | 2%                    |
| <i>Xenopsylla brasiliensis</i>          | –                           | –                          | 12%                        | –                     |
| <i>Xenopsylla humilis</i>               | –                           | –                          | 2%                         | –                     |
| Intensity (agriculture)                 | 0.2 ± 0.4                   | 0.2 ± 0.4                  | 0.2 ± 0.4                  | –                     |
| Intensity (conserved)                   | 0.3 ± 0.5                   | –                          | 0.1 ± 0.4                  | 0.1 ± 0.3             |
